# Supplementary material for: Engineering commercial polycrystalline precursors to single crystal Ni-rich cathodes with outstanding long-cycle performance
Source: Royal Society of Chemistry journal article supplement (doi:10.1039/d3ta02369a), 2023-01-01
Supplement: d3ta02369a1.pdf [file d3ta02369a1.pdf]

## Supplementary Material

### **Engineering commercial polycrystalline precursor to single crystal Ni-rich cathode with outstanding long-cycle performance**

Chunxia Wang <sup>a,b,#</sup>, Hanyuan Dong <sup>a,b,#</sup>, Xiaoming Zhang <sup>a,b</sup>, Yutong Wang <sup>a,b</sup>, Tongjun Shen <sup>a,b</sup>, Jiawei Wen <sup>a,b</sup>, Wang Yang <sup>a,b</sup>, Guoyong Huang <sup>a,b,\*</sup>, Haimu Ye <sup>a,b,\*</sup>, Yongfeng Li <sup>a,b</sup>, Shengming Xu <sup>c</sup>

<sup>a</sup> College of New Energy and Materials, China University of Petroleum, Beijing 102249, China

<sup>b</sup> State Key Laboratory of Heavy Oil Processing, China University of Petroleum, Beijing 102249, China

<sup>c</sup> Institute of Nuclear & New Energy Technology, Tsinghua University, Beijing 100084, China

# These two authors contribute equally.

Corresponding Author:

E-mail: huanggy@cup.edu.cn. (G. Huang), E-mail: yehaimu@cup.edu.cn. (H. Ye)

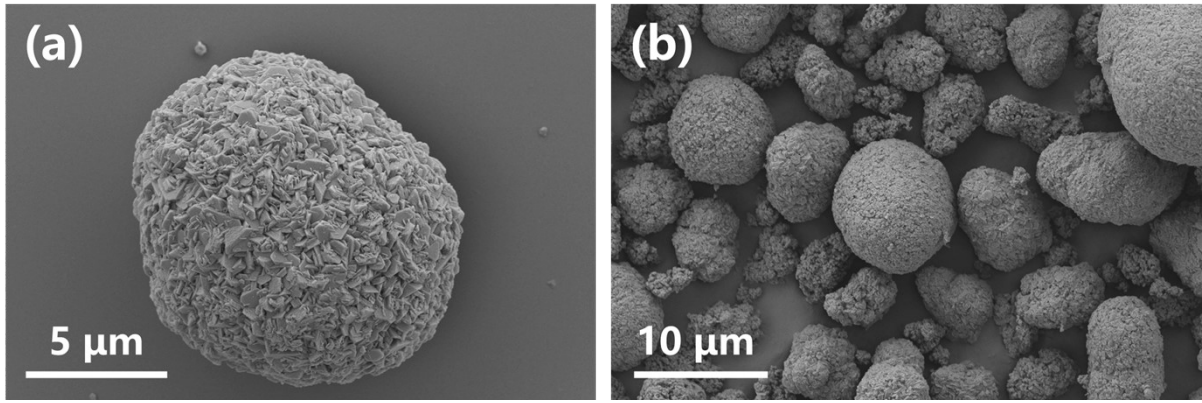

**Fig. S1.** Commercial polycrystalline NCM cathode precursors used in the synthesis process.

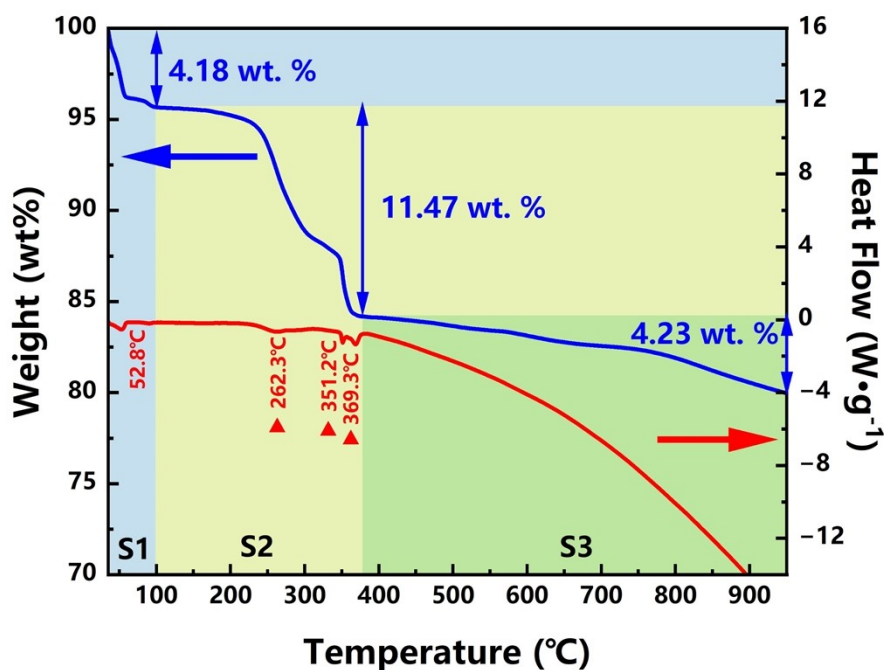

**Fig. S2.** TGA-DSC analysis of reactant.

Thermogravimetric analysis (TGA) is employed to determine the phase change, thermal decomposition of reactant by which the portion of weight change as a function of temperature can be obtained. As depicted in Fig. S2, in the initial stage (S1), a sudden weight reduction of about 4.18 wt. % (blue curve) corresponds to the evaporation of free water. The second stage (S2) shows a weight reduction of 11.47 wt. % from 100 °C to 375 °C, corresponding to the decomposition of reactants and melting of molten salts. The third stage (S3) decreases in weight by 4.23 wt. % and forms a stable plateau at around 600 °C while negligible weight loss can be observed until temperature reach up to 950 °C. We found out that the DSC curves indicate that the actual heat absorption process in second stage (S2) only occurs at 262.3 °C, 351.2 °C, and 369.3 °C which is lower than the eutectic temperature of LiOH-Li<sub>2</sub>SO<sub>4</sub> system at 407 °C from phase diagram database. Therefore, it is assumed that the presence of transition metal hydroxide may lower the melting point of the system and promote the homogeneous dispersion of the reactants. The above results indicate that the stable product is generated after 750 °C before the molten salt agent is completely melted, and processes such as evaporation of the molten salt agent occur subsequently. Combined with the reports in literature, 950 °C was finally chosen as the optimum reaction temperature of the system.

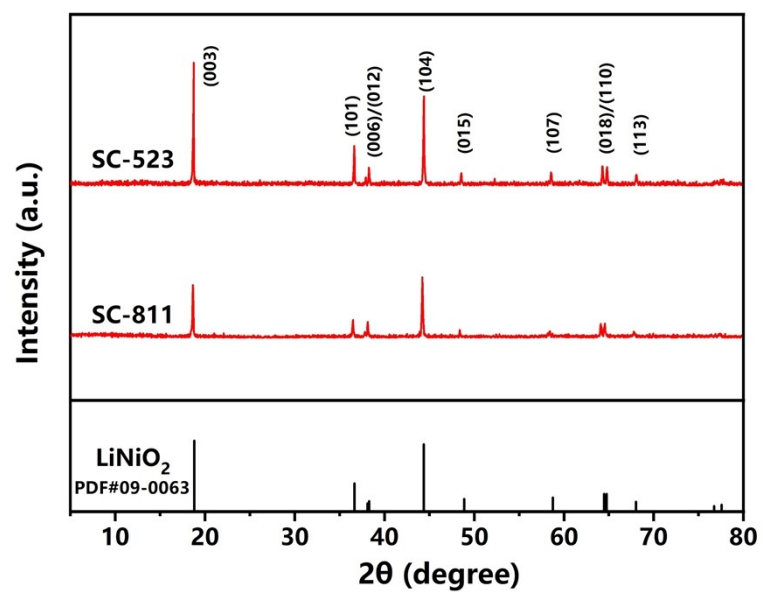

**Fig. S3.** XRD patterns of SC-523 and SC-811 cathode materials.

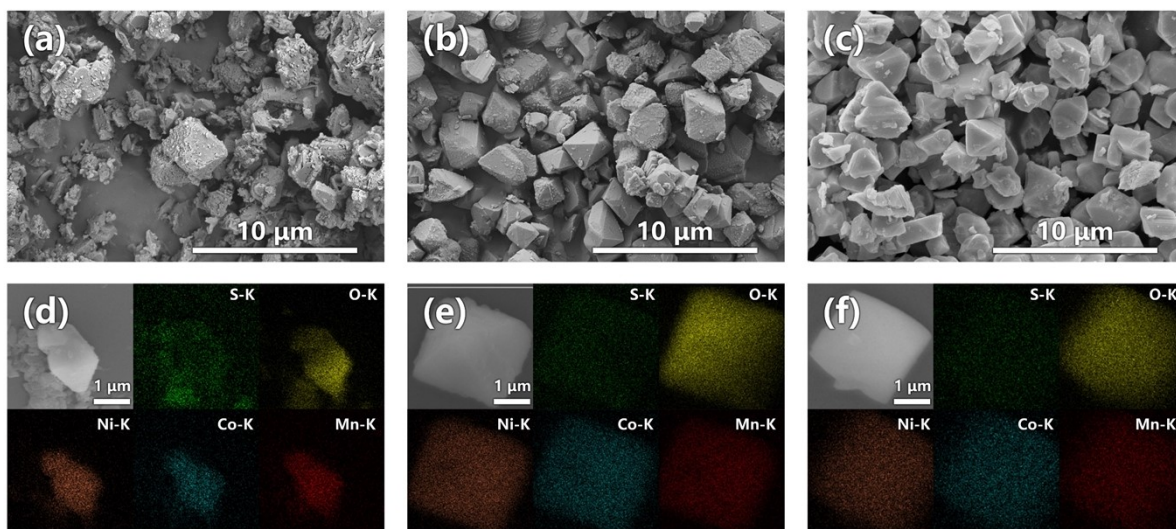

**Fig. S4.** SEM images of a) SC-1, b) SC-2, c) SC-3, element mapping of d) SC-1, e) SC-2, f) SC-3, respectively.

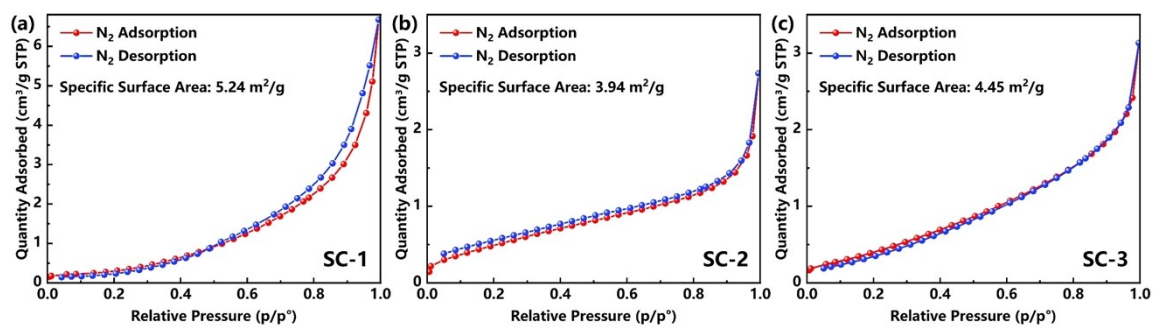

**Fig. S5.**  $\text{N}_2$  adsorption/desorption isotherms of SC-1, SC-2 and SC-3, respectively.

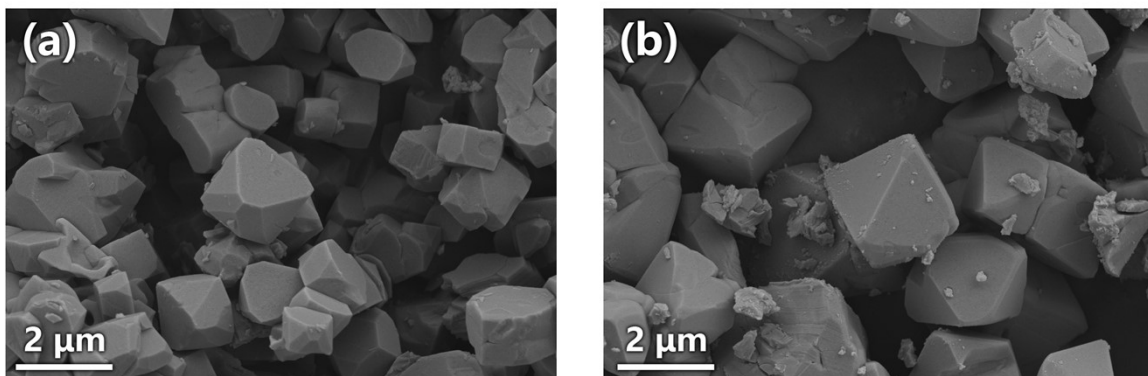

**Fig. S6.** SEM images of a) SC-523 and b) SC-811 cathode materials.

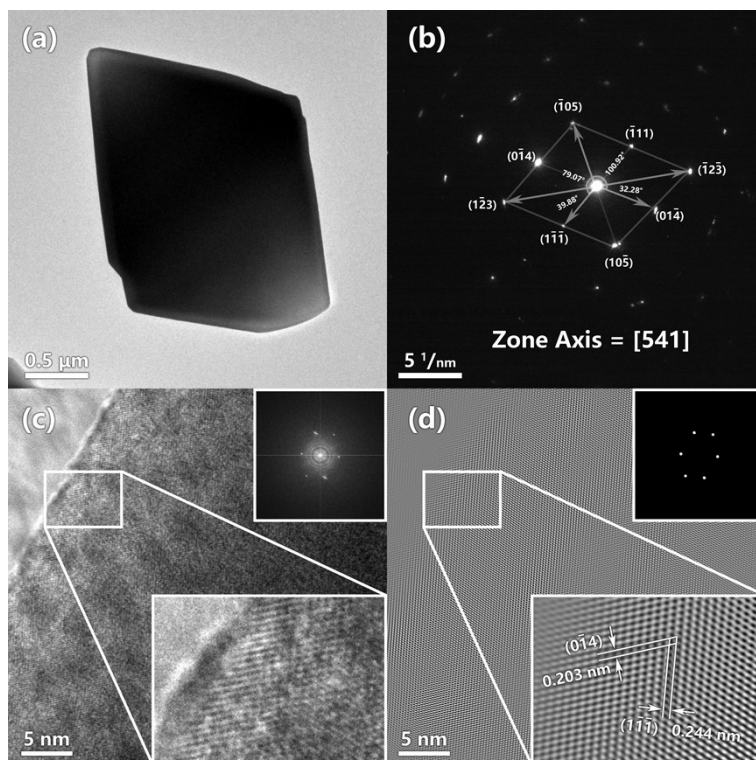

**Fig. S7.** TEM and SAED images of selected area of SC-3. a) TEM image b) SAED image c) HRTEM image, and d) processed HRTEM image of c) by filter.



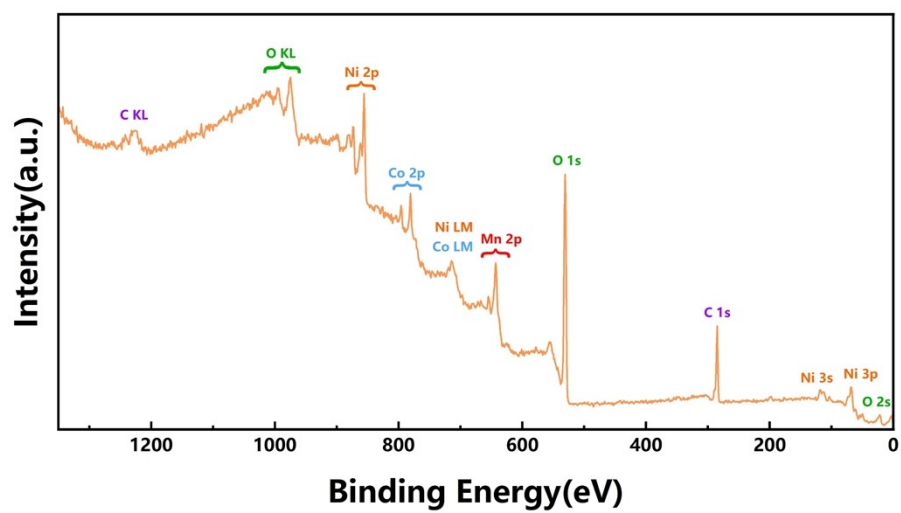

Fig. S8. XPS survey of SC-3.

**Table S1.** Binding energy (eV) and peak area (%) of Ni, Co and Mn elements obtained from XPS spectra.

| Item           | Unit | 2p 3/2 Peak      |                  |                  |                  |       | 3s Peak     |
|----------------|------|------------------|------------------|------------------|------------------|-------|-------------|
|                |      | Ni <sup>2+</sup> | Ni <sup>3+</sup> | Co <sup>2+</sup> | Co <sup>3+</sup> | Mn    | $\Delta$ Mn |
| Binding Energy | eV   | 855.0            | 856.1            | 780.8            | 780.1            | 642.6 | 4.6         |
| Peak Area      | %    | 32.7             | 67.3             | 52.7             | 47.3             | -     | -           |

**Table S2.** Comparison of single crystal NCM cathode under different synthesis strategies at room temperature (25 °C).

| Electrode material                                                        | Preparation strategy         | Specific Capacity (mAh·g <sup>-1</sup> ) | Rate  | Cycles | Capacity Retention | Ref.      |
|---------------------------------------------------------------------------|------------------------------|------------------------------------------|-------|--------|--------------------|-----------|
|                                                                           |                              |                                          |       | 150    | 97.3%              |           |
|                                                                           |                              |                                          |       | 200    | 92.2%              |           |
|                                                                           |                              |                                          |       | 300    | 86.3%              |           |
| LiNi <sub>0.6</sub> Co <sub>0.2</sub> Mn <sub>0.2</sub> O <sub>2</sub>    | Molten salt method           | 168.4                                    | 1.0 C | 400    | 81.1%              | This work |
|                                                                           |                              |                                          |       | 600    | 74.2%              |           |
|                                                                           |                              |                                          |       | 800    | 70.0%              |           |
|                                                                           |                              |                                          |       | 1000   | 52.9%              |           |
| LiNi <sub>0.8</sub> Co <sub>0.1</sub> Mn <sub>0.1</sub> O <sub>2</sub>    | High temperature method (HT) | ~170.0                                   | 1.0 C | 150    | 91.1%              | [56]      |
| LiNi <sub>0.8</sub> Co <sub>0.1</sub> Mn <sub>0.1</sub> O <sub>2</sub>    | HT                           | 170.0                                    | 0.5 C | 150    | 90.0%              | [37]      |
| LiNi <sub>0.88</sub> Co <sub>0.09</sub> Mn <sub>0.03</sub> O <sub>2</sub> | HT                           | 202.3                                    | 0.5 C | 200    | 86.5%              | [57]      |
| LiNi <sub>0.6</sub> Co <sub>0.2</sub> Mn <sub>0.2</sub> O <sub>2</sub>    | HT                           | ~160.0                                   | 0.5 C | 200    | 84.8%              | [55]      |
| LiNi <sub>0.76</sub> Mn <sub>0.14</sub> Co <sub>0.1</sub> O <sub>2</sub>  | Molten salt method           | 193.4                                    | 0.1 C | 200    | 81.6%              | [36]      |
| LiNi <sub>0.6</sub> Co <sub>0.2</sub> Mn <sub>0.2</sub> O <sub>2</sub>    | HT                           | ~190.0                                   | 1.0 C | 200    | 58.8%              | [35]      |
| LiNi <sub>0.8</sub> Co <sub>0.1</sub> Mn <sub>0.1</sub> O <sub>2</sub>    | HT                           | 190.0                                    | 1.0 C | 300    | 84.1%              | [58]      |
| LiNi <sub>0.76</sub> Mn <sub>0.14</sub> Co <sub>0.1</sub> O <sub>2</sub>  | HT                           | 185.0                                    | 0.3 C | 400    | 78.5%              | [18]      |

## Reference for theoretical calculation

### Gibbs-Wulff Theorem:

The crystal morphology was constructed based on Gibbs-Wulff Theorem:

$$\frac{\sigma_1}{\nu_1} = \frac{\sigma_2}{\nu_2} = \frac{\sigma_3}{\nu_3} = \dots = \frac{\sigma_1}{r_1} = \frac{\sigma_2}{r_2} = \frac{\sigma_3}{r_3} = \dots$$

### Reasons for selecting LiNiO<sub>2</sub> cells for the calculations:

- (1) The LiNiO<sub>2</sub> and NCM cells belong to the same *R-3m* space group, and the NCM cathode can be regarded as the doping product of LiNiO<sub>2</sub>, with only the atomic distribution of the transition metal layer being different, and the physical phase characteristics and electrochemical properties of NCM622 are quite similar to those of LiNiO<sub>2</sub> due to its high nickel content.
- (2) The LiNiO<sub>2</sub> transition metal layer has only one kind of transition metal atoms, which well solves the problem of low symmetry, non-chemometric ratios and arithmetic power limitation in the case of non-homogeneous distribution of multiple elements.

### About exposed surface Li-mix:

Similar to Li-Ni mixing, when Ni atoms are exposed to the surface, *d*-orbitals with high energy will lead to a large increase in surface energy, when Li atoms exchange positions with Ni atoms could reduce the energy of the system. This property will lead to a large change in the surface atomic distribution, and the surface energy can be reduced. This phenomenon is named as Li-mix.

### Effect of process parameters on product:

In Fig. 7a, the crystal formation process is closely related to the process parameters (Fig. 1a). The suitable synthetic formulations and higher calcination temperature allowed the growth of single crystal particles of moderate size, and the rapid natural cooling process with a slightly lower annealing temperature avoided the change of crystal morphology. Under the above synthesis conditions, the low surface energy of the specific crystalline facets drives the crystals to form single crystal particles with octahedral morphology, and only the facet families (003) and (012) constitute the surface. This explains why the above process parameters allow the formation of octahedral-shaped single crystals.
